# The Cholesterol Metabolite 25-Hydroxycholesterol Activates Estrogen Receptor $\alpha$ -Mediated Signaling in Cancer Cells and in Cardiomyocytes

Rosamaria Lappano<sup>1</sup>✉, Anna Grazia Recchia<sup>1</sup>✉, Ernestina Marianna De Francesco<sup>1</sup>, Tommaso Angelone<sup>2</sup>, Maria Carmela Cerra<sup>1</sup>, Didier Picard<sup>3</sup>, Marcello Maggiolini<sup>1\*</sup>

**1** Department of Pharmaco-Biology, University of Calabria, Rende, Italy, **2** Department of Cell Biology, University of Calabria, Rende, Italy, **3** Département de Biologie Cellulaire, Université de Genève, Genève, Switzerland

## Abstract

**Background:** The hydroxylated derivatives of cholesterol, such as the oxysterols, play important roles in lipid metabolism. In particular, 25-hydroxycholesterol (25HC) has been implicated in a variety of metabolic events including cholesterol homeostasis and atherosclerosis. 25HC is detectable in human plasma after ingestion of a meal rich in oxysterols and following a dietary cholesterol challenge. In addition, the levels of oxysterols, including 25HC, have been found to be elevated in hypercholesterolemic serum.

**Methodology/Principal Findings:** Here, we demonstrate that the estrogen receptor (ER)  $\alpha$  mediates gene expression changes and growth responses induced by 25HC in breast and ovarian cancer cells. Moreover, 25HC exhibits the ER $\alpha$ -dependent ability like 17 $\beta$ -estradiol (E2) to inhibit the up-regulation of HIF-1 $\alpha$  and connective tissue growth factor by hypoxic conditions in cardiomyocytes and rat heart preparations and to prevent the hypoxia-induced apoptosis.

**Conclusions/Significance:** The estrogen action exerted by 25HC may be considered as an additional factor involved in the progression of breast and ovarian tumors. Moreover, the estrogen-like activity of 25HC elicited in the cardiovascular system may play a role against hypoxic environments.

**Citation:** Lappano R, Recchia AG, De Francesco EM, Angelone T, Cerra MC, et al. (2011) The Cholesterol Metabolite 25-Hydroxycholesterol Activates Estrogen Receptor  $\alpha$ -Mediated Signaling in Cancer Cells and in Cardiomyocytes. PLoS ONE 6(1): e16631. doi:10.1371/journal.pone.0016631

**Editor:** Vincent Laudet, Ecole Normale Supérieure de Lyon, France

**Received:** September 7, 2010; **Accepted:** December 27, 2010; **Published:** January 31, 2011

**Copyright:** © 2011 Lappano et al. This is an open-access article distributed under the terms of the Creative Commons Attribution License, which permits unrestricted use, distribution, and reproduction in any medium, provided the original author and source are credited.

**Funding:** This work was supported by Associazione Italiana per la Ricerca sul Cancro (AIRC, project n. 8925/2009) (<http://www.airc.it/>) and Ministero dell'Università e Ricerca Scientifica e Tecnologica (MIUR) (<http://www.istruzione.it/>). The funders had no role in study design, data collection and analysis, decision to publish, or preparation of the manuscript.

**Competing Interests:** The authors have declared that no competing interests exist.

\* E-mail: marcellomaggiolini@yahoo.it

✉ These authors contributed equally to this work.

## Introduction

The estrogen receptor (ER)  $\alpha$  and  $\beta$  belong to the nuclear receptor superfamily of ligand-inducible transcription factors [1]. The binding of 17 $\beta$ -estradiol (E2) to ERs induces receptor homodimerization and interaction with specific estrogen responsive elements (EREs) located within the regulatory regions of target genes [2]. Two separate activation domains mediate the ER-dependent transcriptional activity: the activation function (AF)-1 located in the amino-terminus and the hormone-dependent AF-2 located in the ligand binding domain (LBD) [3]. The binding of ligands to ER induces the formation of an AF-2 hydrophobic pocket which regulates the recruitment of cofactors and importantly receptor pharmacology [4–5].

Previous results obtained in both cell culture and animal models have indicated that ER $\alpha$  plays a crucial role in mediating the effects of estrogen in mammary gland development and breast cancer progression [6–7]. Moreover, estrogen has been shown to prevent vascular dysfunction and injury in an ER-dependent manner [8–10], to reduce cardiomyocyte hypertrophy [11] and to

decrease infarct size and myocyte apoptosis in animal models with coronary occlusion [12]. Diverse mechanisms are involved in the protective action exerted by E2 in cardiomyocytes. Oxidative stress and the subsequent generation of reactive oxygen species (ROS) are thought to trigger cardiomyocyte apoptosis [13], while the ability of E2-activated ER to counteract these redox intermediates is very likely a key factor of overall cardioprotection. The cell response to lowered oxygen environment implicates the hypoxia-inducible-factor-1 (HIF-1), which regulates the expression of genes like the matricellular protein named Connective Tissue Growth Factor (CTGF) belonging to the CCN family of growth regulators (*Cyr61*, *CTGF* and *nov*) [14]. The levels of CTGF are up-regulated during wound repair [15], inflammation [16], fibrotic disorders [17], tumor growth [18–19] and angiogenesis [18,20]. Accumulating evidence has also suggested that CTGF exerts a crucial role in cardiac fibrotic processes, indicating it as a possible biomarker and a potential candidate for therapeutic intervention [21].

Oxysterols are hydroxylated derivatives of cholesterol that play important functions in lipid metabolism [22]. 25-hydroxycholes-

terol (25HC) which is synthesized from cholesterol by a specific hydroxylase [23], acts as a potent inhibitor of cholesterol biosynthesis in different cell types [24]. 25HC was detected in rat plasma after ingestion of a meal rich in oxysterols and following a dietary cholesterol challenge [25]. Likewise, the levels of oxysterols, including 25HC, were higher in hypercholesterolemic serum compared to those found in normocholesterolemic serum [26]. Next, mice deficient in the oxysterol-catabolizing enzyme oxysterol 7 $\alpha$ -hydroxylase (Cyp7b) showed elevated concentrations of both 25HC and 27HC, suggesting a regulatory role elicited by Cyp7b on these hydroxylated cholesterol derivatives [27].

In the present study, we demonstrate that 25HC elicits estrogenic effects activating ER $\alpha$ -mediated signaling either in breast and ovarian cancer cells or in cardiomyocytes. The results obtained were confirmed, at least in part, in isolated and perfused rat hearts.

## Materials and Methods

### Reagents

17 $\beta$ -estradiol (E2), 25-hydroxycholesterol (25HC), cobalt chloride (CoCl<sub>2</sub>), PD98059 (PD), SB202190 (SB) and actinomycin D were purchased from Sigma-Aldrich, Inc., Milan, Italy. The experiments performed using 25HC from Sigma-Aldrich, Inc., Milan (Italy) were confirmed with 25HC purchased from Research Plus, Inc., Barnegat, NJ. ICI 182,780 (ICI) was obtained from Tocris Chemicals. All compounds were solubilized in dimethyl sulfoxide (DMSO), except E2 and PD, which were dissolved in ethanol.

### Cell Culture

Breast cancer MCF7 and human embryonal kidney Hek293 cells were maintained in DMEM with phenol red supplemented with 10% FBS. Breast SkBr3 and ovarian BG-1 cancer cells were maintained in RPMI1640 and DMEM, respectively, without phenol red supplemented with 10% FBS. The murine cardiomyocyte-like cell line HL-1 was kindly provided by Dr. William C. Claycomb (Louisiana State University Medical Center, New Orleans, LA). HL-1 cells were cultured according to the published protocol [28] in Claycomb medium (JRH Biosciences, Sigma-Aldrich, Inc., Milan, Italy) supplemented with 10% FBS (JRH Bioscience, Sigma-Aldrich, Inc., Milan, Italy), 100 $\mu$ g/ml penicillin/streptomycin, 0.1mM norepinephrine (Sigma-Aldrich, Inc., Milan, Italy) and 2mM *l*-glutamine (Invitrogen, Milan, Italy). All cell lines were grown in a 37°C incubator with 5% CO<sub>2</sub>. For hypoxic stimulation HL-1 cells were treated with CoCl<sub>2</sub> or cultured in presence of low oxygen tension (2% O<sub>2</sub>) in a HeraCell incubator (ThermoScientific-Heraeus, Milan, Italy). All cell lines to be processed for immunoblot and RT-PCR assays were switched to medium without serum and phenol red 24 h before treatments.

### Transfections, luciferase assays and gene silencing experiments

Plasmids and Luciferase Assays were previously described [29–32]. In particular, we used expression vectors encoding the full length ER $\alpha$  and the ER $\beta$  form encoding the 485 aa protein [29–32]. Cells were plated into 10-cm dishes, maintained in serum-free medium for 24 h and then transfected for additional 24 h before treatments using Fugene6 (Roche Molecular Biochemicals, Milan, Italy) and appropriate control vectors. The SureSilencing™ shRNA plasmids for mouse HIF-1 $\alpha$  and respective negative control plasmids (shRNA) were purchased

from Superarray Bioscience Corporation (Frederick, MD, USA) and were used according to the manufacturer's recommendations (Cat. KM03799P). Briefly, cells were plated into 10-cm dishes, and then transfected in serum-free medium for 24h before treatments with a mixture containing 15 $\mu$ l/plate Fugene6 Reagent and 5 $\mu$ g/plate control shRNA or shRNA HIF-1 $\alpha$  (shHIF-1 $\alpha$ ) plasmid. For HIF-1 $\alpha$  silencing, the manufacturer provides 4 separate short hairpin RNA (shRNA) pre-designed sequences for the same gene, packaged in 4 separate plasmid backbones (numbered as 1–4). In our experiments, a single independent shRNA plasmid sequence (n.3) was sufficient to silence HIF-1 $\alpha$  gene expression. The control shRNA is a scrambled artificial sequence which does not match any human, mouse or rat gene.

### ER $\alpha$ binding assays

The ability of 25HC to compete with [3H]E2 for binding to ER $\alpha$  was evaluated either in MCF7 cells or using Hek293 cell lysates in presence or absence of two picomoles of purified recombinant human ER $\alpha$  protein purchased from PanVera, Invitrogen S.r.l. Milan, Italy. MCF7 cells were stripped of any estrogen by keeping them in medium without serum for 2 days, thereafter cells were incubated with 1nM [2,4,6,7-3H]E2 (89 Ci/mmol; Ge Healthcare, Milan, Italy) and increasing concentrations of nonlabeled E2 or 25HC for 2 h at 37°C in a humidified atmosphere of 95% air/5% CO<sub>2</sub>. After removal of the medium, cells were washed with ice-cold PBS/0.1% methylcellulose twice, harvested by scraping and centrifugation, and lysed with 100% ethanol, 500  $\mu$ l per 60 mm dish, for 10 min at room temperature [33]. The radioactivity of extracts was measured by liquid scintillation counting. Binding assay was also performed using Hek293 whole cell lysates. Cells were stripped of any estrogen by keeping them in medium without serum for 2 days, and then lysed in 500 $\mu$ l of RIPA buffer (20mM Tris-HCl, pH 7.5; 100mM NaCl; 0.5% Nonidet P-40; 0.5mM EDTA) in presence of a mixture of protease inhibitors containing 1,7 mg/ml aprotinin, 1 mg/ml leupeptin, 200 mmol/liter phenylmethylsulfonyl fluoride, 200 mmol/liter sodiumorthovanadate and 100 mmol/liter sodium fluoride. Protein concentration was determined using Bradford reagent according to the manufacturer's recommendations (Sigma-Aldrich, Inc., Milan, Italy). Equal amounts of whole-protein extract were incubated in the absence or presence of two picomoles of recombinant ER $\alpha$  and incubated with 1nM [3H]E2 and increasing concentrations of unlabeled E2 or 25HC for 2 h at 4°C. Bound and free radioligands were separated on Sephadex G-25 PD-10 columns. The amount of receptor-bound [3H]E2 was determined by liquid scintillation counting.

### Chromatin immunoprecipitation (ChIP) and Re-ChIP assays

MCF7 cells were grown in 10-cm dishes to 70–80% confluence, shifted to serum free medium for 24 h and then treated with vehicle, 10nM E2 or 1 $\mu$ M 25HC for 1 h. Thereafter, cells were cross-linked with 1% formaldehyde and sonicated. Supernatants were immunocleared with sonicated salmon DNA/protein A agarose (Upstate Biotechnology, Inc., Lake Placid, NY) and immunoprecipitated with anti-ER $\alpha$  antibody or non specific IgG (Santa Cruz Biotechnology, DBA, Milan, Italy). Pellets were washed, eluted with a buffer consisting of 1% SDS and 0.1 mol/L NaHCO<sub>3</sub>, and digested with proteinase K. DNA was obtained by phenol/chloroform extraction and precipitated with ethanol. A 4  $\mu$ l volume of each sample was used as template to amplify an ERE-containing region located in the pS2 promoter by real-time PCR (Applied Biosystems, Milan, Italy). The primers used were 5'-GGCCATCTCTCACTATGAATCACTTCTGC-3' (pS2 forward) and 5'-GGCAGGCTCTGTTTGCTTAAAGAGCG-3'

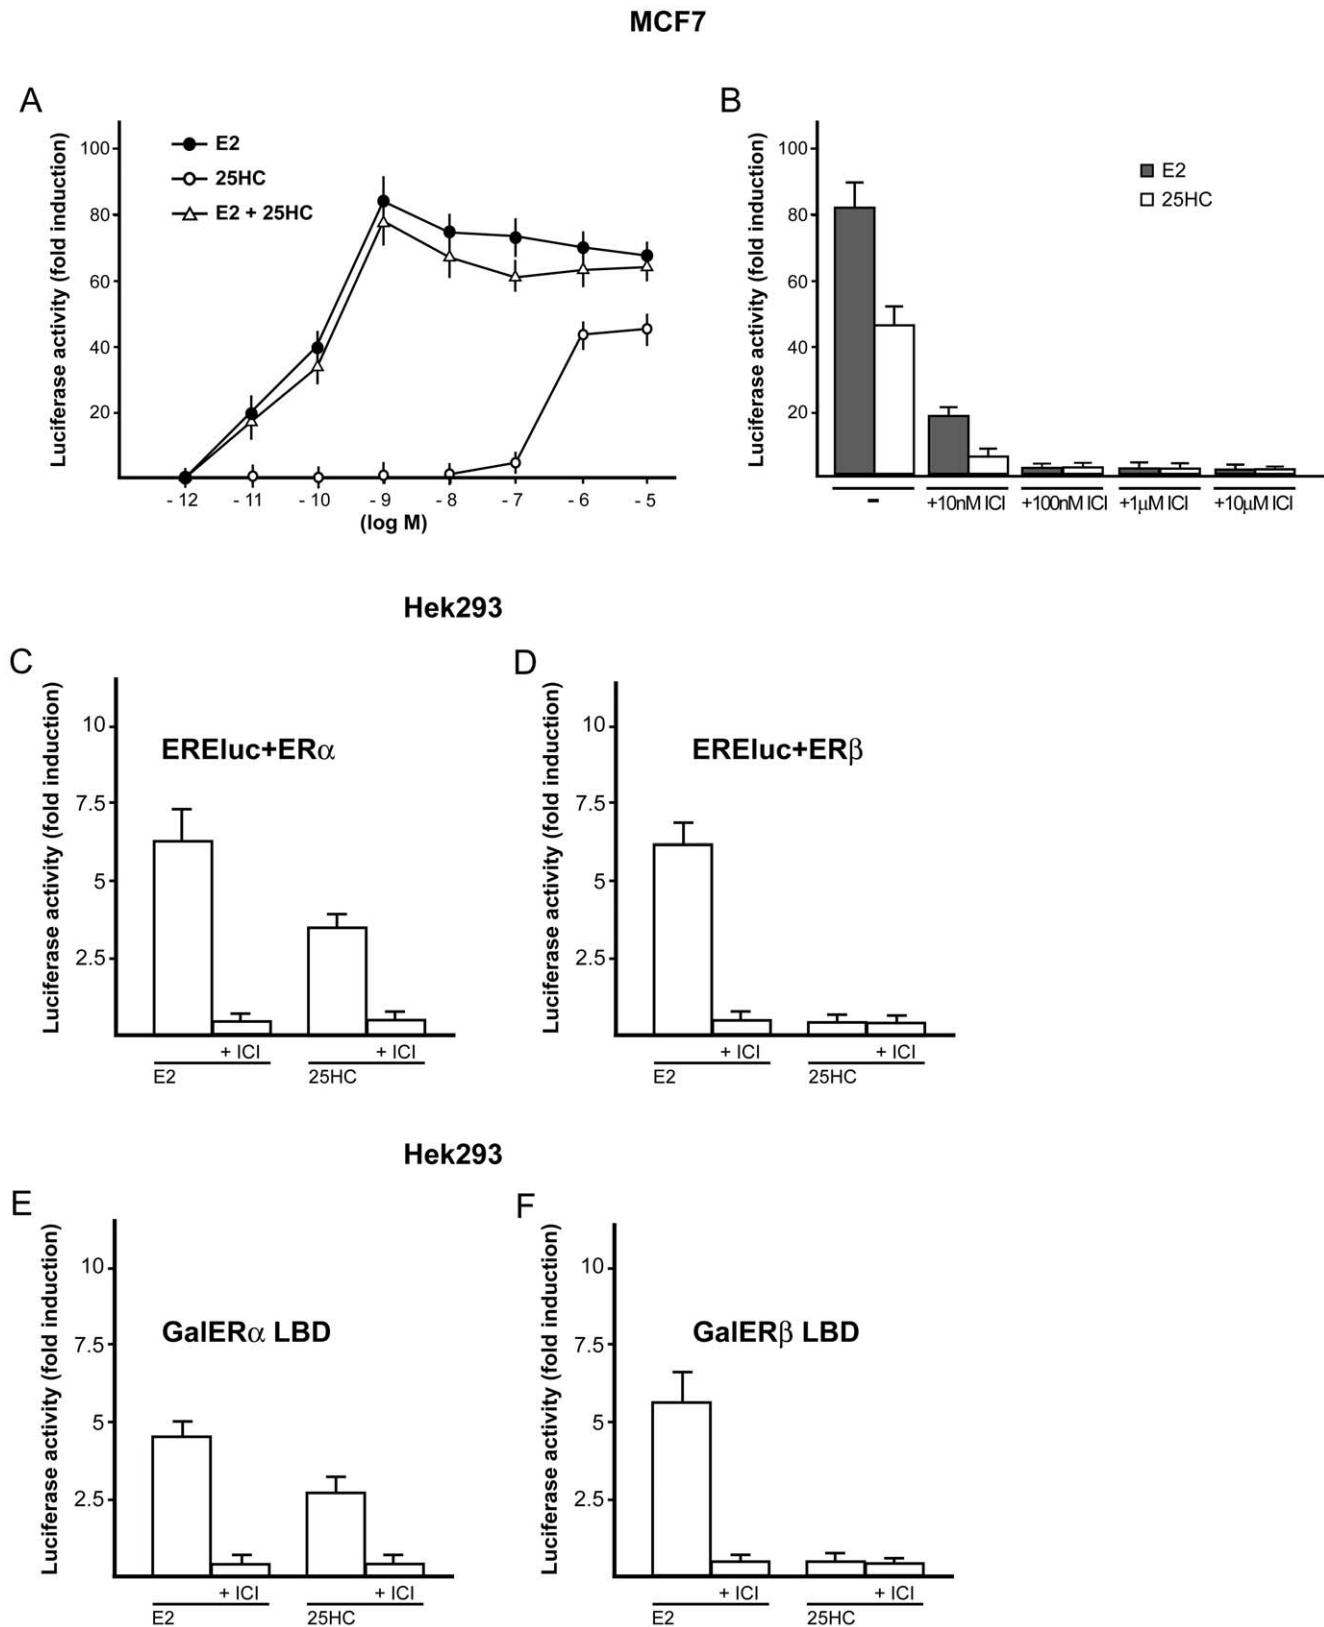

**Figure 1. 25HC activates ER $\alpha$ .** (A) MCF7 cells were transfected with an ER luciferase reporter gene along with the internal transfection control Renilla Luciferase and treated with increasing concentrations (logarithmic scale) of E2 and 25HC. Moreover, cells were treated simultaneously with similar doses of each compound. The normalized luciferase activity values of cells treated with vehicle (-) were set as 1-fold induction, upon which the activity induced by treatments was calculated. (B) MCF7 cells transfected with the ER reporter gene were treated with 10nM E2 or 1 $\mu$ M 25HC alone and in combination with increasing concentration of the ER antagonist ICI, as indicated. Each data point represents the mean  $\pm$  SD of three

experiments performed in triplicate. (C–F) Hek293 cells were transfected with ER luciferase reporter gene (ERE<sub>luc</sub>) and ER $\alpha$  (C) or ER $\beta$  (D) expression plasmids, with Gal4 reporter gene GK1 and the Gal4 fusion proteins encoding the Ligand Binding Domain (LBD) of ER $\alpha$  (GalER $\alpha$ ) (E) or ER $\beta$  (GalER $\beta$ ) (F) and treated with 10nM E2 or 1 $\mu$ M 25HC alone and in combination with 10 $\mu$ M ER antagonist ICI, as indicated. Each data point represents the mean  $\pm$  SD of three experiments performed in triplicate.  
doi:10.1371/journal.pone.0016631.g001

(pS2 reverse). Data were normalized to the input for the immunoprecipitation. In Re-ChIP experiments, complexes were eluted by incubation for 30 min in Re-IP buffer (0.5 mM dithiothreitol, 1% Triton X-100, 2 mM EDTA, 20 mM Tris-Cl pH 8.1, 150 mM NaCl) and subjected to the ChIP procedure, using anti-SRC-1, SRC-3 and CBP antibodies (all purchased from Santa Cruz Biotechnology, DBA, Milan, Italy).

### Reverse transcription and real-time PCR

Gene expression was evaluated by real-time PCR as we previously described [32]. For pS2, PR, Cathepsin D, Cyclin A, Cyclin D1, HIF-1 $\alpha$ , CTGF, FAS, SERPINF1, HSPA1L, SELENBP1 and the ribosomal protein 18S, which was used as a control gene to obtain normalized values, the primers were: 5'-GCCCCCGTGAAAGAC-3' (pS2 forward) and 5'-CGTCGAAACAGCAGCCCTTA-3' (pS2 reverse); 5'-GAGTTGTGAGAGCACTGGATGCT-3' (PR forward) and 5'-CAACTGTATGTCTTGACCTGGTGAA-3' (PR reverse); 5'-CTGGATCACCACAAGTACAACA-3' (Cathepsin D forward) and 5'-CGAGCCATAGTGGATGTCAAAC-3' (Cathepsin D reverse); 5'-TGCACCCCTTAAGGATCTTCCT-3' (Cyclin A forward) and 5'-GTGAACGCAGGCTGTTTACTGT-3' (Cyclin A reverse); 5'-GTCTGTGCATTTCTGGTTGCA-3' (Cyclin D1 forward) and 5'-GCTGAAACATGCCGGTTA-3' (Cyclin D1 reverse); 5'-TGCATCTCCATCTTCTACCCAAGT-3' (HIF-1 $\alpha$  forward) and 5'-CCGACTGTGAGTGCCACTGT-3' (HIF-1 $\alpha$  reverse); 5'-CATTAAGAAGGGCAAAAAGTGCAT-3' (CTGF forward) and 5'-TGCAGCCAGAAAGCTCAAAC-3' (CTGF reverse); 5'-CGCTCGGCATGGCTATCT-3' (FAS forward) and 5'-CTCGTTGAAGAACGCATCCA-3' (FAS reverse); 5'-CCCGGATCGTCTTTGAGAAG-3' (SERPINF1 forward) and 5'-TCCAGAGGTGCCACAAAGCT-3' (SERPINF1 reverse); 5'-CCGTGCCAGCCTATTTCAAT-3' (HSPA1L forward) and 5'-AGCAATCACACCTGCATCCTT-3' (HSPA1L reverse); 5'-GCAGCGCCATGAGATTGTG-3' (SELENBP1 forward) and

5'-CGGATCTCCAAGGGAATAAGC-3' (SELENBP1 reverse), and 5'-GGCGTCCCCCAACTTCTTA-3' (18S forward) and 5'-GGGCATCACAGACCTGTTATT-3' (18S reverse), respectively.

### Immunoblotting

Cell lysates and immunoblotting assays were performed as previously described [32]. The antibodies against ER $\alpha$  (F-10), Cyclin D1 (M-20), CTGF (L-20), phosphorylated ERK1/2 (E-4) and ERK2 (C-14),  $\beta$ -actin (C-2) and  $\beta$ -tubulin (H-235-2) were purchased from Santa Cruz Biotechnology (DBA, Milan, Italy). ER $\beta$  and HIF-1 $\alpha$  were purchased from R&D Systems, Inc. (Milan, Italy). Phospho-p38MAPK (Thr180/Tyr182) and p38MAPK were purchased from Cell Signalling Technology, Inc. (Milan, Italy).

### Proliferation and TUNEL assays

Quantitative proliferation assays were performed as previously described [32]. HL-1 cells were plated in 2-well Lab-Tek<sup>®</sup> II chamber slides and treated for 18 h. After removing medium, cells were fixed in 4% buffered paraformaldehyde (pH 7.4) for 30 min. Slides were rinsed twice in PBS, pH 7.4. An *in situ* cell death detection kit (DeadEnd<sup>™</sup>, Fluorometric TUNEL System, Promega Corp, Milan, Italy) was subsequently used to perform DNA 3'-hydroxyl end labelling by TUNEL (Terminal deoxynucleotidyl Transferase (TdT)-mediated dUTP-X Nick End Labelling) assay as previously described [34]. Labelling of cells was shown to be correlated with typical morphological criteria of apoptosis. DNA was labelled in 3'-ends with fluorescein-dUTP by incubation at 37°C with reaction buffer containing TdT in a humidified chamber for 1 h. Nuclei of cells were stained with propidium iodide. After three washes in PBS, apoptotic DNA fragmentation was directly detected by visualization of labelled DNA using fluorescent microscope. For negative control, slides were incubated without TdT; to obtain positive control, slides were treated with

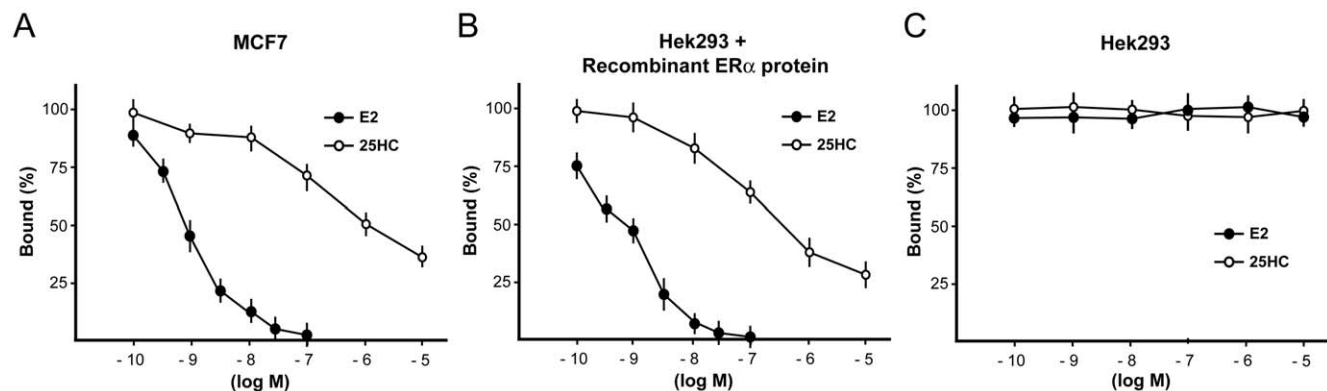

**Figure 2. ER $\alpha$  ligand binding assays.** The graphs show residual binding of the radioactive tracer in the presence of increasing concentrations of unlabelled E2 and 25HC in MCF7 cells (A), in Hek293 cell lysates in the presence (B) or absence of recombinant ER $\alpha$  protein (C). Each data point represents the mean  $\pm$  SD of triplicate samples of three separate experiments. Note that the amount of tracer bound in the absence of competitor was arbitrarily set to 100% and that the underlying absolute values differ between the three panels.  
doi:10.1371/journal.pone.0016631.g002

1 $\mu$ g DNase I/ml for 10 min at room temperature before exposure to fluorescein dUTP and TdT.

### Isolated and perfused heart preparations

All experimental protocols were approved by the Committee on the Use of Animals of the Pharmacology-Biology Department at the University of Calabria (approval ID 110/2000A). The procedures followed in the study were in accordance with the European Community standards on the care and use of laboratory animals and with the *Guide for the Care and Use of Laboratory Animals* published by the US National Institutes of Health (NIH Publication No. 85-23, revised 1996). Adult male rats (Wistar, 220–280g, Harlan, Udine, Italy) were anaesthetized by i.p. injection of ethyl carbamate (2 g/kg body weight). Hearts were then dissected out and connected to a Langendorff apparatus for perfusion with a Krebs–Henseleit solution (KHS) composed of (in mM) NaCl 113, KCl 4.7, NaHCO<sub>3</sub> 25, MgSO<sub>4</sub> 1.2, CaCl<sub>2</sub> 1.8, KH<sub>2</sub>PO<sub>4</sub> 1.2, glucose 11, mannitol 1.1, Na-pyruvate 5 and gassed with 95%O<sub>2</sub>-5%CO<sub>2</sub> (pH7.4, 37°C). KHS was delivered at a constant flow-rate of 12 mL/min. To measure cardiac activity, a water-filled latex balloon, connected to a BLPR gauge (WRI, Inc. USA), was inserted through the mitral valve into the left ventricle to allow isovolumic contractions and to continuously record mechanical parameters. The balloon was progressively filled with water to obtain an initial left ventricular end diastolic pressure of 5 to 8 mmHg [35]. All hearts were perfused for a 15 min equilibration period. After the equilibration period, the hearts (n = 3) were randomly assigned to one of the following groups: Group 1 (control): KH gassed with 95%O<sub>2</sub>-5%CO<sub>2</sub>; Group 2: KH gassed with 95%O<sub>2</sub>-5%CO<sub>2</sub> plus 1nM E2; Group 3: KH gassed with 95%O<sub>2</sub>-5%CO<sub>2</sub> plus 100nM 25HC; Group 4: KH gassed with 50%O<sub>2</sub>-45%N<sub>2</sub>-5%CO<sub>2</sub>; Group 5: KH gassed with 50%O<sub>2</sub>-45%N<sub>2</sub>-5%CO<sub>2</sub> plus 1nM E2; Group 6: KH gassed with 50%O<sub>2</sub>-45%N<sub>2</sub>-5%CO<sub>2</sub> plus 100nM 25HC.

All hearts were perfused for 60 minutes to investigate the effect of each compound and of the different oxygen levels on the changes of CTGF and HIF-1 $\alpha$  mRNA expression. Solution containing treatments was freshly prepared before experiments. Left ventricular pressure, heart rate and coronary flow were monitored throughout the perfusion protocol. At the end of the perfusions, ventricles were excised and immediately processed for RNA extraction.

### Statistical Analysis

Statistical analysis was done using ANOVA followed by Newman-Keuls' testing to determine differences in means. P<0.05 was considered as statistically significant.

## Results

### 25HC activates ER $\alpha$ in cancer cells

We began evaluating whether 25HC is able to transactivate a transiently transfected ER reporter gene in breast cancer cells (MCF7), which express ER $\alpha$  and not ER $\beta$  as judged by RT-PCR (data not shown). Interestingly, 25HC activated ER $\alpha$  in a dose-dependent manner, although with a lower efficacy compared to E2 (Fig. 1A). We next evaluated whether 25HC could antagonize the transcriptional activation induced by E2. MCF7 cells were then treated simultaneously with increasing concentrations of both 25HC and E2, however the transcriptional responses were similar to those obtained using E2 alone (Fig. 1A). On the contrary, the luciferase activity induced by 10nM E2 or 1 $\mu$ M 25HC were abrogated using increasing doses of the ER antagonist ICI (Fig. 1B), suggesting that ER $\alpha$  mediates the transcriptional

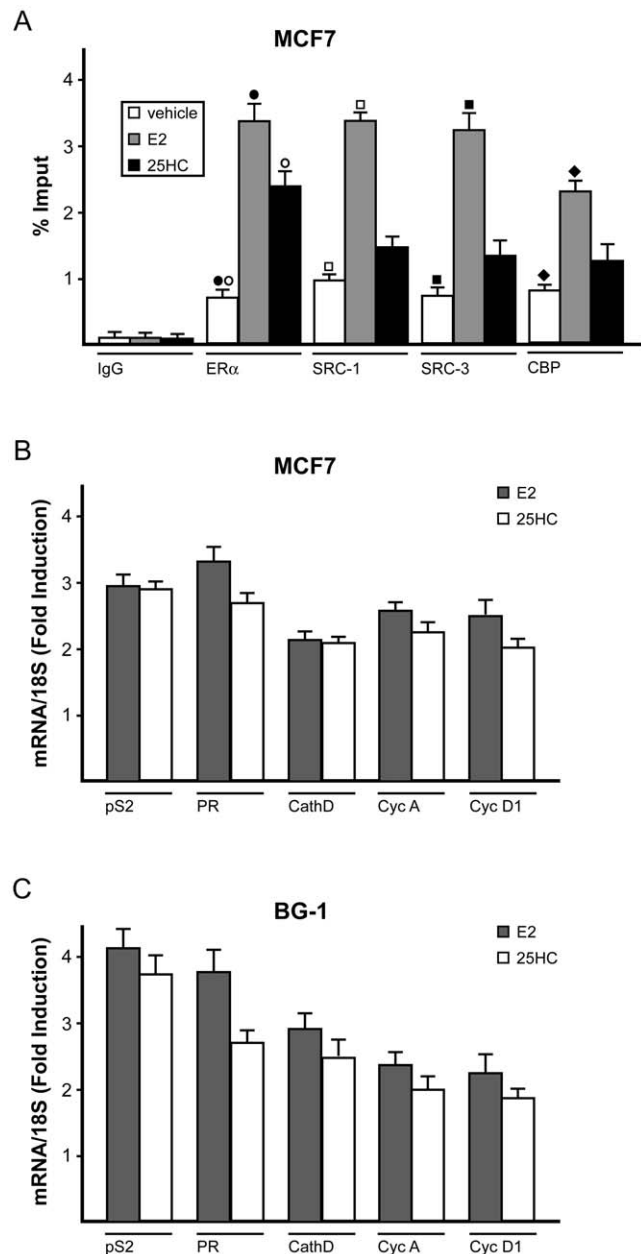

**Figure 3. 25HC up-regulates the expression of estrogen target genes.** (A) E2 and 25HC induce the recruitment of ER $\alpha$  to the ERE site located in the pS2 promoter sequence in MCF7 cells. Cells were treated for 1 h with vehicle, E2 (10nM) or 25HC (1 $\mu$ M) and submitted to the chromatin immunoprecipitation procedure using anti-ER $\alpha$  or non-specific anti-IgG antibodies. For Re-ChIP assays, anti-SRC-1, SRC-3 and CBP antibodies were used. The amplified sequences were evaluated by real-time PCR. (B–C) evaluation of mRNA expression of pS2, Progesterone Receptor (PR), Cathepsin D, Cyclin A and Cyclin D1 by real-time PCR in MCF7 and BG-1 cells. Cells were treated for 24h with 10nM E2 and 1 $\mu$ M 25HC. Results obtained from experiments performed in triplicate were normalized for 18S expression and shown as fold change of RNA expression compared to cells treated with vehicle. Each data point represents the mean  $\pm$  SD of three experiments performed in triplicate. (●), (○), (■), (◊) indicate  $p$ <0.05 for cells receiving vehicle (–) versus treatments.

doi:10.1371/journal.pone.0016631.g003

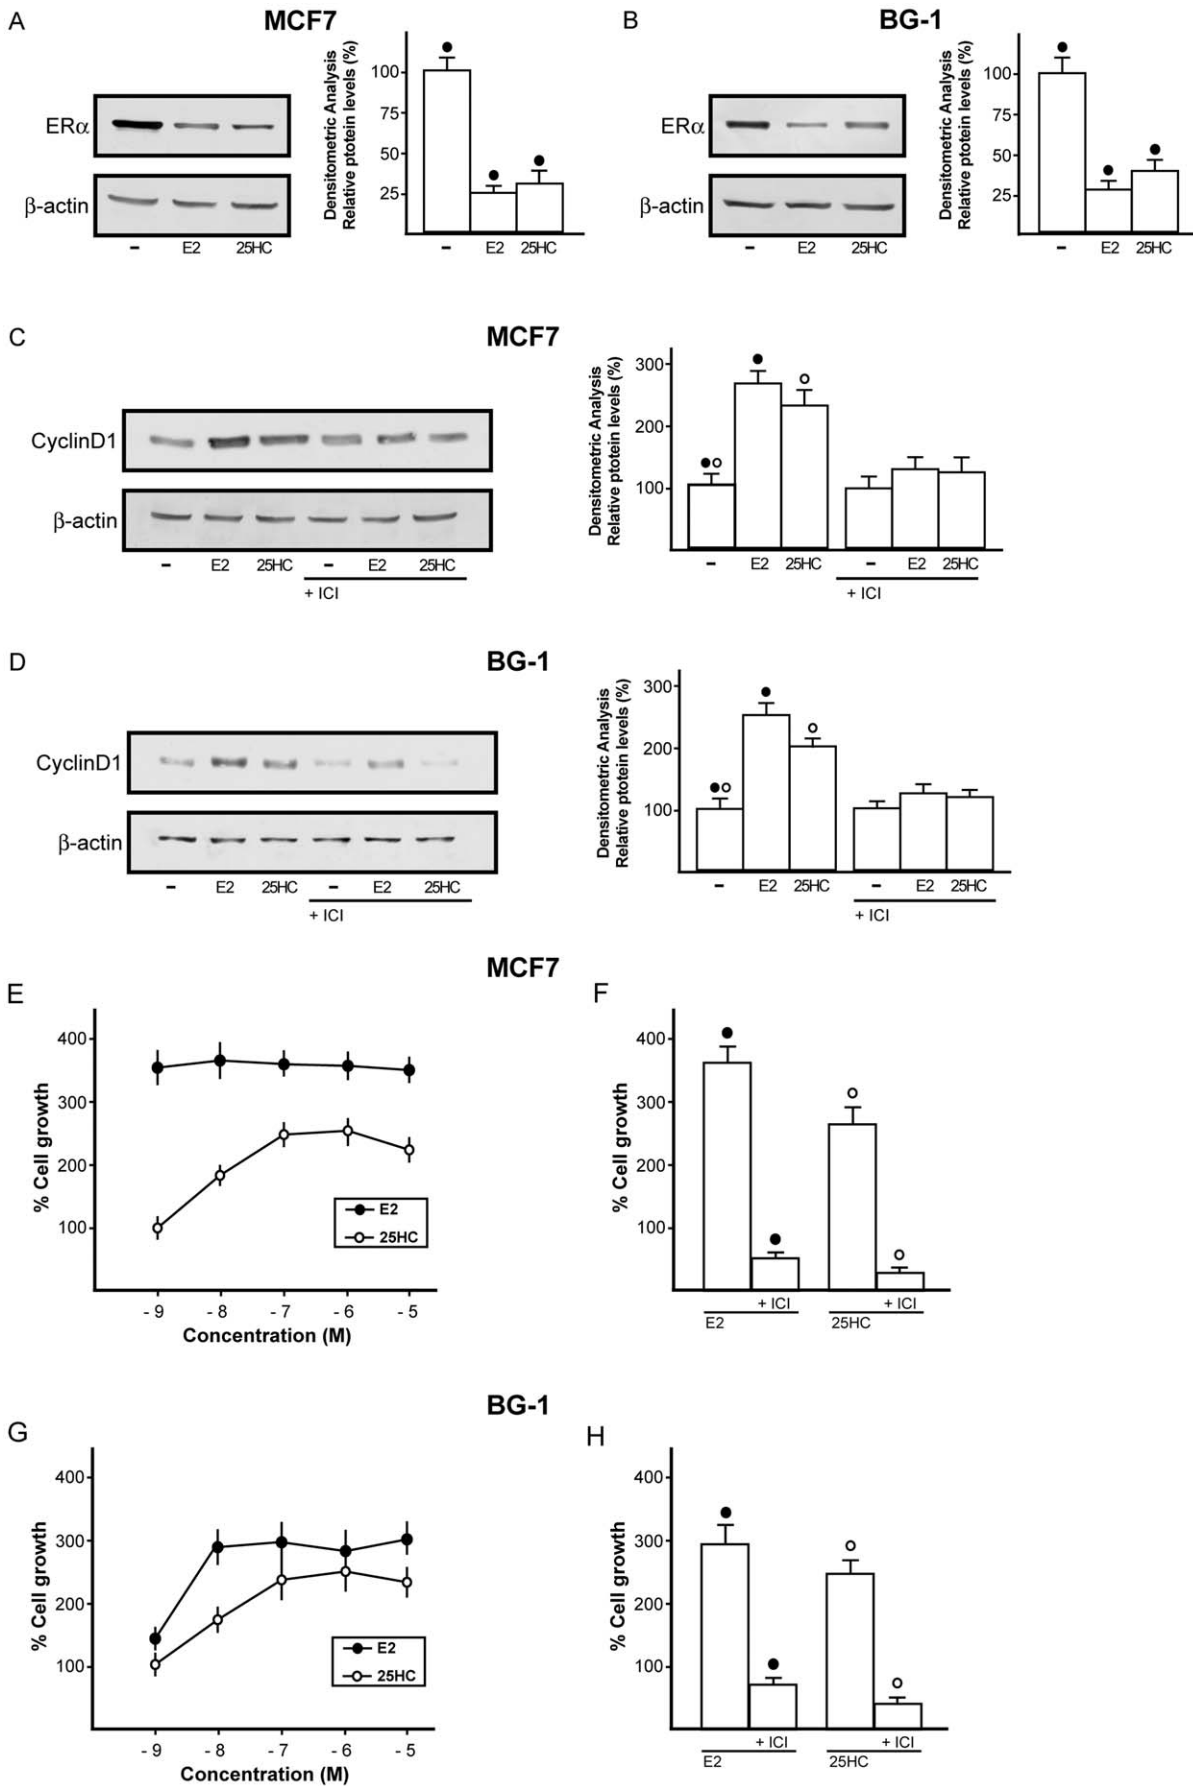

**Figure 4. 25HC induces cancer cell proliferation.** Immunoblots of ER $\alpha$  (A, B) and Cyclin D1 (C, D) from MCF7 and BG-1 cells. Cells were treated for 24h with vehicle (-), 10nM E2 or 1 $\mu$ M 25HC and in presence of 10 $\mu$ M ER-antagonist ICI, as indicated.  $\beta$ -actin serves as loading control. 25HC induces proliferative effects in MCF7 and BG-1 cells (E–H). Cells were treated for 5 days with increasing concentrations (logarithmic scale) of E2 and 25HC and counted on day 6 (E,G). Cells were treated with 10nM E2 or 1 $\mu$ M 25HC and in combination with 10 $\mu$ M ER-antagonist ICI and counted on day 6 (F,H). Proliferation of cells receiving vehicle was set as 100% upon which cell growth induced by treatments was calculated. Each data point is the average  $\pm$  SD of three independent experiments. (\*), (°) indicate  $p < 0.05$  for cells receiving vehicle (-) versus treatments. doi:10.1371/journal.pone.0016631.g004

activation upon exposure to each compound. To provide further data regarding the ability of 25HC to activate ER $\alpha$  and to evaluate whether ER $\beta$  could also respond to 25HC, we transiently transfected ER-negative Hek293 cells with the ER reporter gene along with the expression vector encoding ER $\alpha$  or ER $\beta$ . Of note, only ER $\alpha$  expression allowed 1 $\mu$ M 25HC to induce the luciferase activity, which was abolished by 10 $\mu$ M ICI (Fig. 1C–D). To provide further evidence regarding the ability of 25HC to activate ER $\alpha$  but not ER $\beta$ , we turned to a completely heterologous system. In Hek293 cells, 1 $\mu$ M 25HC activated a chimeric protein consisting of the DNA binding domain (DBD) of the yeast transcription factor Gal4 and the LBD of ER $\alpha$  but not ER $\beta$  (Fig. 1E–F). Again, the transactivation of ER $\alpha$  was abolished by 10 $\mu$ M ICI (Fig. 1E–F). To corroborate the aforementioned findings, we ascertained whether 25HC could induce the expression of the ER $\beta$  target genes SERPINF1, HSPA1L, SELENBP1, which were reported to respond to E2 treatment [36]. Using Hek293 cells transiently transfected with an ER $\beta$  expression plasmid, the transcription of these genes was stimulated by E2 but not by 25HC (Fig. S1). Taken together, these results demonstrate that 25HC activates ER $\alpha$  in a selective manner and show that ER $\alpha$ -LBD is sufficient for the transcriptional response.

On the basis of the results obtained in transfection experiments, we asked whether 25HC could behave as a ligand and compete with E2 for the binding to ER $\alpha$ . In a whole cell binding assay with MCF7 cells 25HC displaced the radiolabeled E2 in a dose-dependent manner (Fig. 2A). Similarly, when recombinant ER $\alpha$  was added to a Hek293 cell lysate, which by itself does not bind E2, 25HC competed efficiently against the tracer E2 (Fig. 2B–C). The results of these binding assays are compatible with the idea that 25HC binds ER $\alpha$  directly, but further experiments will be necessary to establish the mode of action unambiguously.

#### 25HC induces the recruitment of ER $\alpha$ to the pS2 promoter sequence in MCF7 cells

On the basis of the aforementioned findings, we evaluated whether 25HC could induce the recruitment of ER $\alpha$  to targeted ERE-containing DNA region within the pS2 promoter sequence. Performing a chromatin immunoprecipitation (ChIP) assay in MCF7 cells, 1h treatment with 1 $\mu$ M 25HC induced the recruitment of ER $\alpha$  to the pS2 promoter as observed using 10nM E2 (Fig. 3A). Moreover, to verify whether 25HC may recruit co-activators to the pS2 promoter, we performed Re-ChIP assay using antibodies against SRC-1 and SRC-3, which belong to the steroid receptor co-activator (SRC) families and against CBP (CREB-binding protein) [37]. All co-activators were efficiently recruited to the pS2 promoter exposing MCF7 cells to 10nM E2, however 1 $\mu$ M 25HC showed a slight efficacy (Fig. 3A). Hence, E2 and 25HC display a different ability in recruiting co-activators, which contribute to the agonistic potency of ligands.

#### 25HC regulates the expression of ER $\alpha$ target genes in MCF7 and BG-1 cells

We next evaluated the potential of 25HC to regulate the expression of well known ER $\alpha$  target genes, such as pS2, PR,

Cathepsin D, Cyclin A and Cyclin D1 in MCF7 breast and BG-1 ovarian cancer cells. As determined by real-time RT-PCR, a 24 h exposure to 1 $\mu$ M 25HC up-regulated the mRNA expression of all genes examined, similar to the treatment with 10nM E2 (Fig. 3B–C). To further corroborate these findings, we investigated the ability of 25HC to modulate the expression of ER $\alpha$  and Cyclin D1 protein levels in MCF7 and BG-1 tumor cells. To date, the down-regulation of ER $\alpha$  by estrogen has been considered a hallmark of receptor activation [38], while the up-regulation of Cyclin D1 by E2 has been extensively reported [39]. Notably, a 24 h exposure to 1 $\mu$ M 25HC down-regulated ER $\alpha$  protein levels (Fig. 4A–B). On the contrary, a 24 h treatment with 1 $\mu$ M 25HC up-regulated Cyclin D1 protein expression, which was abrogated by 10 $\mu$ M ICI (Fig. 4C–D). Altogether, these results suggest that 25HC is able to regulate the expression of ER $\alpha$  target genes like E2.

#### 25HC induces proliferative effects in MCF7 and BG-1 cells

Then, we sought to evaluate the biological counterpart of the above-mentioned effects exerted by 25HC. Growth assays performed in MCF7 and BG-1 cancer cells demonstrated that 25HC is able to induce proliferative effects in a dose dependent manner (Fig. 4E and 4G). Next, the growth responses to 10nM E2 and 1 $\mu$ M 25HC were abolished by 10 $\mu$ M ICI (Fig. 4F and 4H), suggesting that ER $\alpha$  mediates cell proliferation induced upon exposure to both compounds.

#### 25HC mimics the effects of E2 against hypoxia-induced apoptosis in cardiomyocytes

To further evaluate the estrogenic properties of 25HC, we turned to a completely different model system like the HL-1 cardiomyocytes [28], which express ER $\alpha$  and very low ER $\beta$  levels as judged by RT-PCR (data not shown). It has been reported that E2 protects cells from hypoxic insult in different cell contexts [40–42]. Hence, we evaluated whether E2 and 25HC could protect HL-1 cardiomyocytes from apoptosis induced by the well known hypoxia-mimetic agent CoCl<sub>2</sub> [43–44]. Determining DNA degradation by TUNEL assay, approximately 70% of HL-1 cells resulted positive for TUNEL staining after exposure to CoCl<sub>2</sub> (Fig. 5 and Fig. S2). Of note, the percentage of apoptotic cells was significantly reduced in presence of either 10nM E2 or 1 $\mu$ M 25HC (Fig. 5 and Fig. S2). The protective effects exerted by both compounds were abrogated using 10 $\mu$ M ICI, which alone did not induce apoptosis (Fig. 5 and Fig. S2). Taken together, the results shown indicate that E2 and 25HC may protect cardiomyocytes from hypoxia-induced apoptosis in an ER-dependent manner.

#### E2 and 25HC prevent the hypoxia-induced expression of HIF-1 $\alpha$ and CTGF in cardiomyocytes

It has been previously reported that HIF-1 $\alpha$  mediates CTGF expression stimulated by hypoxia in different cell contexts [45–47]. Whilst the potential regulation of HIF-1 $\alpha$  by E2 has been suggested in certain models [48–49], the estrogen ability to influence hypoxia-induced CTGF expression in the cardiovascular system remains to be investigated. On the basis of these observations, we ascertained that HIF-1 $\alpha$  and CTGF are up-

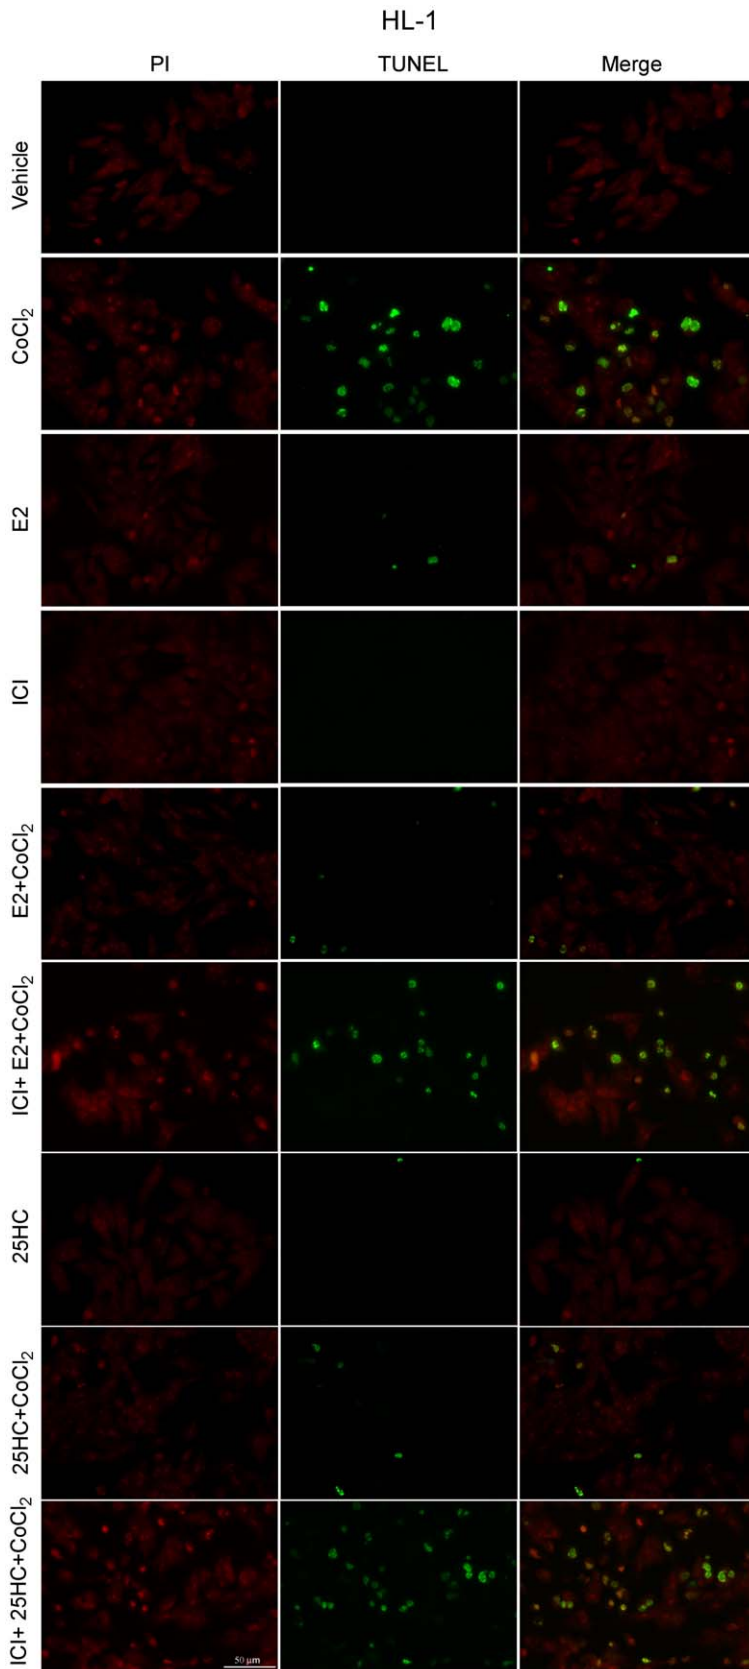

**Figure 5. E2 and 25HC prevent CoCl<sub>2</sub>-induced apoptosis in HL-1 cells.** Apoptotic changes were detected using TUNEL (in green) and nuclei were stained by propidium iodide (PI, in red), as indicated. Representative photographs after 18h treatment with vehicle and 100 $\mu$ M CoCl<sub>2</sub>, 10nM E<sub>2</sub>, 1 $\mu$ M 25HC alone, or a combination of 100 $\mu$ M CoCl<sub>2</sub> with 10nM E<sub>2</sub> in presence or absence of 10 $\mu$ M ICI, 100 $\mu$ M CoCl<sub>2</sub> with 1 $\mu$ M 25HC in presence or absence of 10 $\mu$ M ICI.  
doi:10.1371/journal.pone.0016631.g005



**HL-1**

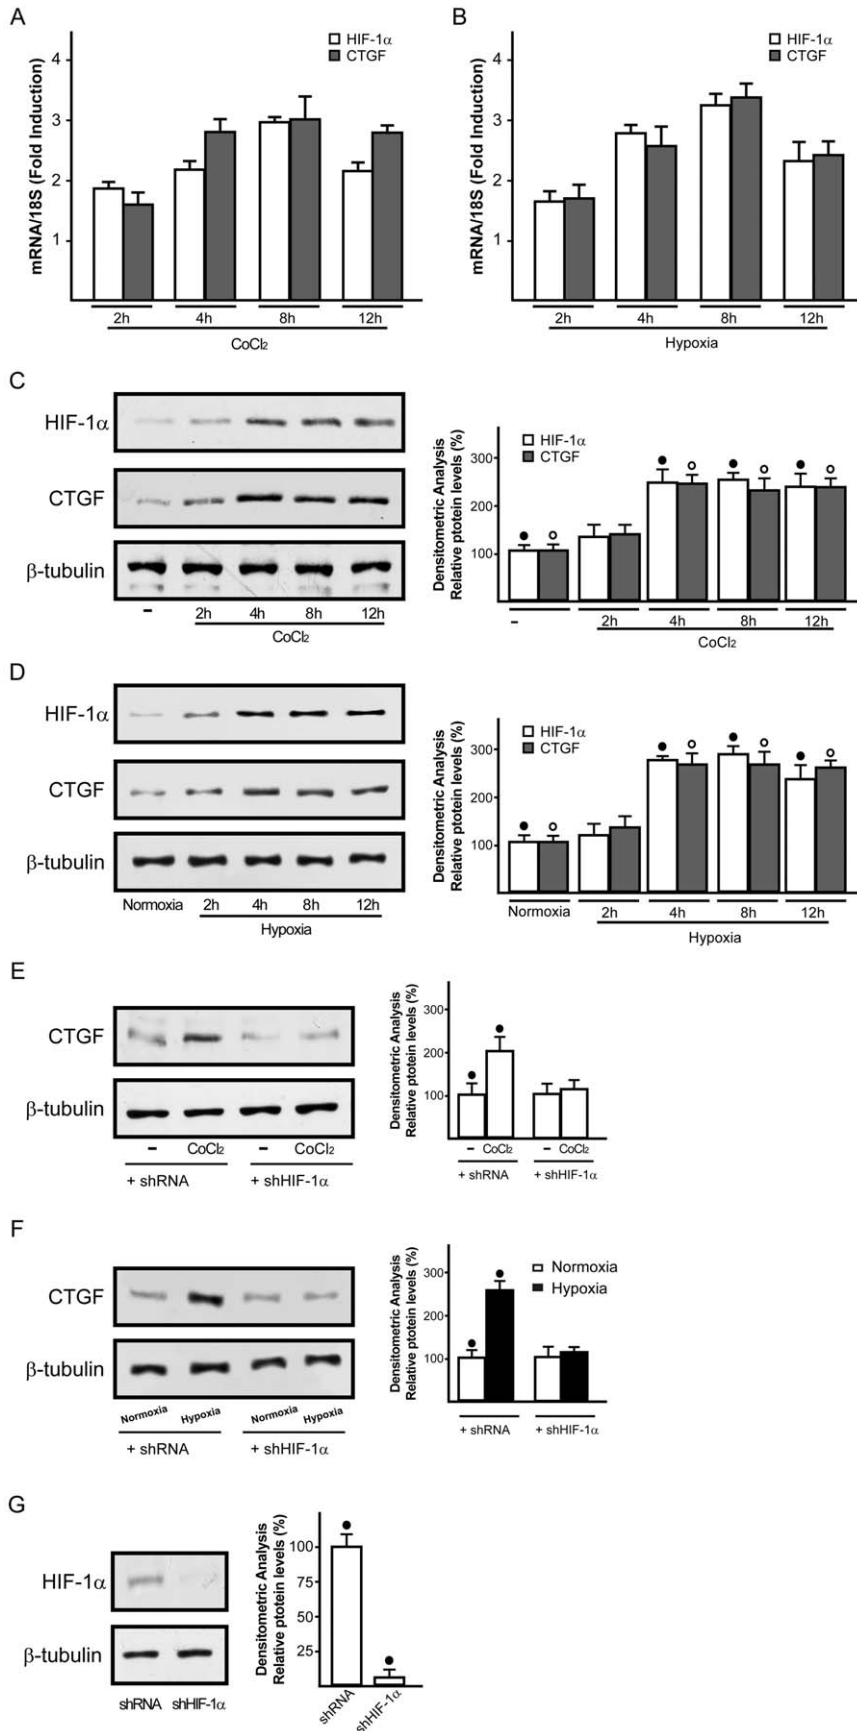

**Figure 6. Evaluation of HIF-1 $\alpha$  and CTGF expression in HL-1 cells.** HIF-1 $\alpha$  and CTGF mRNA expression were evaluated by real-time PCR after 100 $\mu$ M CoCl<sub>2</sub> treatment (A) and incubating HL-1 cells under hypoxia (2% O<sub>2</sub>) (B). Results obtained from experiments performed in triplicate were normalized for 18S expression and shown as fold change of RNA expression compared to cells treated with vehicle (A) or cultured under normoxia (B). (C) immunoblots of HIF-1 $\alpha$  and CTGF from HL-1 cells after treatment with vehicle (-) or 100 $\mu$ M CoCl<sub>2</sub>, as indicated.  $\beta$ -tubulin serves as a loading control. Side panel shows densitometric analysis of the blots, normalized to  $\beta$ -tubulin. (D) immunoblots of HIF-1 $\alpha$  and CTGF from HL-1 cells cultured under normoxia or in presence of low oxygen tension (2% O<sub>2</sub>), as indicated.  $\beta$ -tubulin serves as a loading control. Side panel shows densitometric analysis of the blots, normalized to  $\beta$ -tubulin. Cells were transfected with a control shRNA or shHIF-1 $\alpha$  and exposed for 8h to 100 $\mu$ M CoCl<sub>2</sub> (E) or hypoxic conditions (2% O<sub>2</sub>) (F). Side panels show densitometric analysis of the blots, normalized to  $\beta$ -tubulin. (G) efficacy of HIF-1 $\alpha$  silencing obtained using shHIF-1 $\alpha$ . Each data point is the average  $\pm$  SD of three independent experiments. (\*), (°) indicate  $p < 0.05$  for cells receiving vehicle (-) versus treatments or for cells cultured under normoxia versus cells exposed to hypoxia.  
doi:10.1371/journal.pone.0016631.g006

regulated at both mRNA and protein levels in a time-dependent manner by 100 $\mu$ M CoCl<sub>2</sub> in HL-1 cells (Fig. 6A,C). Similar responses were observed incubating HL-1 cells in presence of low oxygen tension (2% O<sub>2</sub>) (Fig. 6B,D). Next, the hypoxia-induced expression of HIF-1 $\alpha$  and CTGF was abolished using the inhibitor of DNA-primed RNA synthesis actinomycin D (Fig. S3), suggesting that transcriptional mechanisms are responsible for the up-regulation of both HIF-1 $\alpha$  and CTGF. Then, we determined that the silencing of HIF-1 $\alpha$  abrogates CTGF induction observed either upon exposure to CoCl<sub>2</sub> or hypoxic conditions (2% O<sub>2</sub>) (Fig. 6E–F), indicating that HIF-1 $\alpha$  mediates the up-regulation of CTGF by hypoxia in HL-1 cells. Thereafter, we asked whether E2 and 25HC might influence HIF-1 $\alpha$  and CTGF expression. Interestingly, we found that either 10nM E2 or 1 $\mu$ M 25HC prevent the up-regulation of HIF-1 $\alpha$  and CTGF either by CoCl<sub>2</sub> or low oxygen tension (2% O<sub>2</sub>) at both mRNA (Fig. S4) and protein levels (Fig. 7A–B). However, this ability of E2 and 25HC was abolished using 10 $\mu$ M ICI (Fig. 7A–B and Fig. S4), suggesting that the action of both compounds involves an ER-mediated mechanism. To provide further data regarding the intracellular signaling regulating HIF-1 $\alpha$  and CTGF expression, we established that 10nM E2 and 1 $\mu$ M 25HC phosphorylate ERK1/2 and p38MAPK in a rapid manner (Fig. 8A). Accordingly, in presence of the inhibitors of these kinases, PD and SB respectively, both E2 and 25HC lost the repressive effects exerted

on the up-regulation of HIF-1 $\alpha$  and CTGF at both mRNA and protein levels (Fig. 8B–C and Fig. S4). Altogether, these results suggest that 25HC triggers both ER and kinase-mediated signaling similar to E2.

### HIF-1 $\alpha$ and CTGF mRNA induction by hypoxia is prevented by E2 and 25HC in perfused rat hearts

On the basis of the aforementioned results, we examined whether hypoxia could increase HIF-1 $\alpha$  and CTGF mRNA expression in isolated and perfused rat heart preparations. Following the experimental conditions described in Materials and Methods section, rat ventricles were excised after 1h exposure to low pO<sub>2</sub> levels (40%) and subjected to RNA extraction and real-time PCR evaluation. Interestingly, the up-regulation of both HIF-1 $\alpha$  and CTGF expression by hypoxia was abrogated in presence of 1nM E2 or 100nM 25HC (Fig. 9), confirming the results obtained in HL-1 cells.

## Discussion

25HC has been implicated in a variety of relevant metabolic-related events, such as cellular cholesterol homeostasis and atherosclerosis [22]. Moreover, 25HC was shown to be more potent than cholesterol in stimulating cells to respond to high sterol levels either decreasing 3-hydroxy-3-methylglutaryl coen-

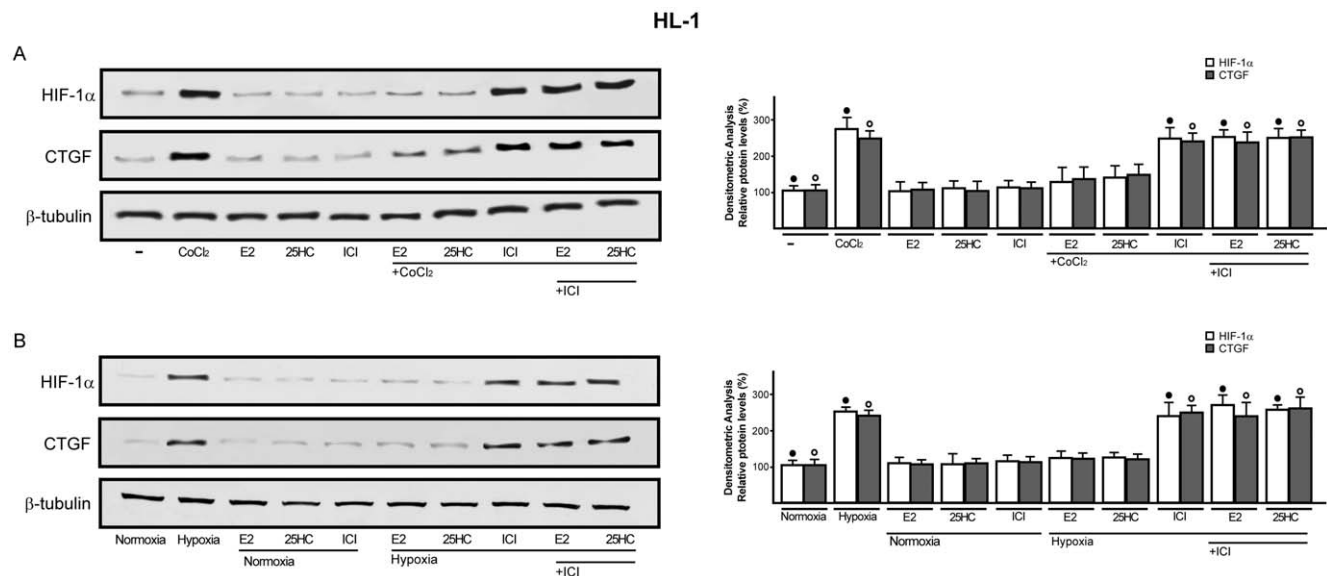

**Figure 7. Immunoblots of HIF-1 $\alpha$  and CTGF from HL-1 cells.** (A) cells were treated for 8h with 100 $\mu$ M CoCl<sub>2</sub> or (B) exposed to hypoxia (2% O<sub>2</sub>), in combination with 10nM E2, 1 $\mu$ M 25HC and 10 $\mu$ M ICI, as indicated.  $\beta$ -tubulin serves as loading control. Data (mean  $\pm$  SD) are representative of three independent experiments. Side panels show densitometric analysis of the blots, normalized to  $\beta$ -tubulin. (\*), (°) indicate  $p < 0.05$  for cells receiving vehicle (-) versus treatments or for cells cultured under normoxia versus cells exposed to hypoxia.  
doi:10.1371/journal.pone.0016631.g007

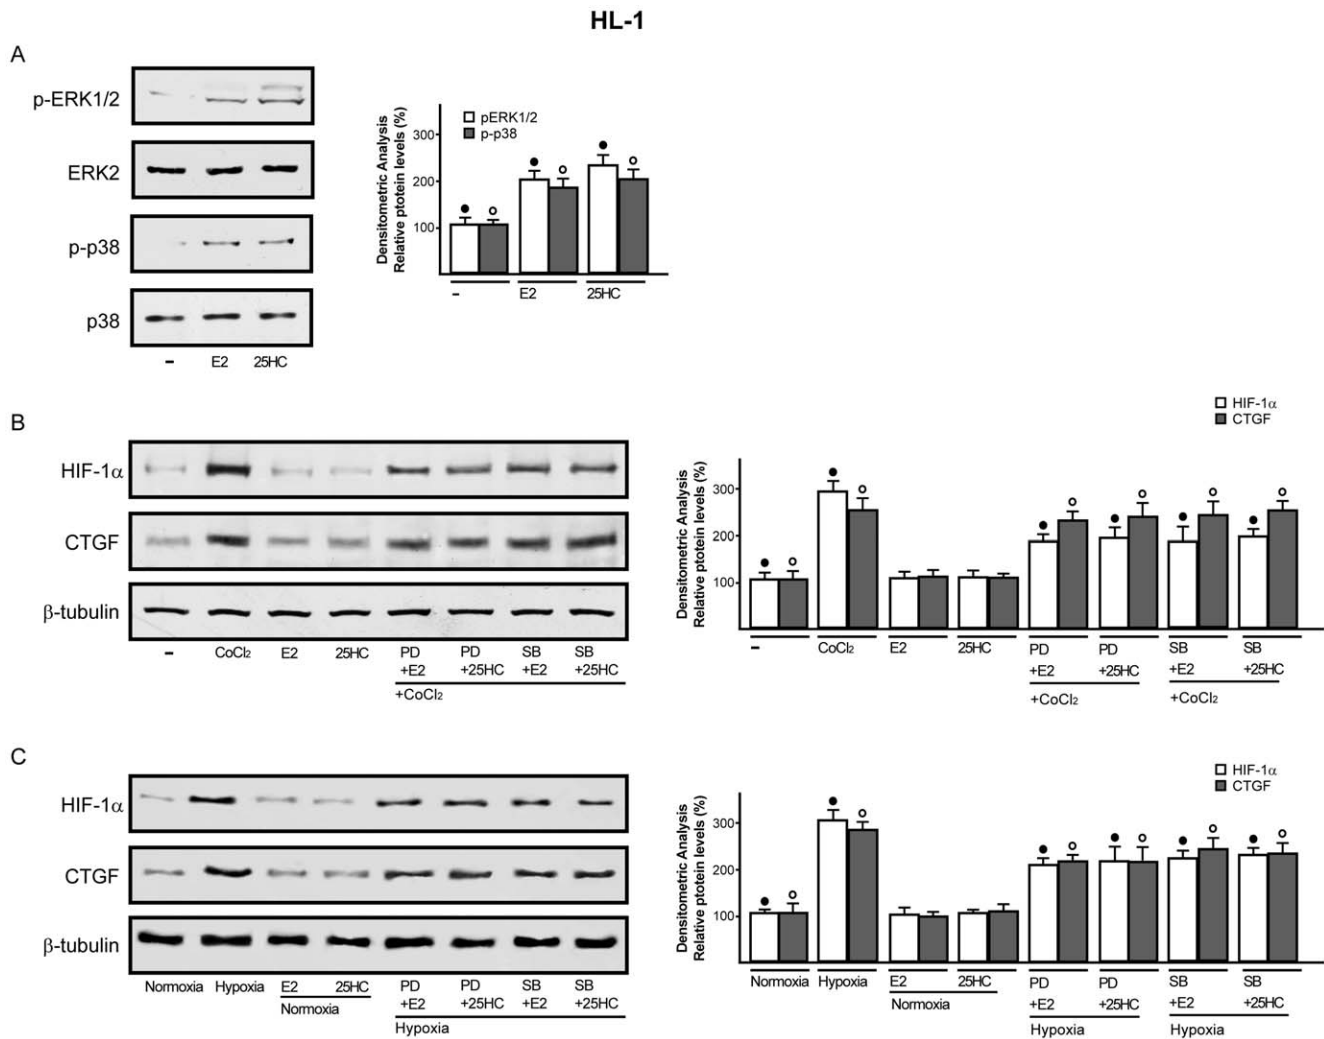

**Figure 8. 25HC prevents the hypoxia-induced expression of HIF-1 $\alpha$  and CTGF through kinase-mediated signalling.** (A) immunoblots of p-ERK1/2 and p-p38 from HL-1 cells treated for 10 min with vehicle (-), 10nM E2 and 1 $\mu$ M 25HC. Total ERK/2 and p38 serve as loading control. (B) immunoblots of HIF-1 $\alpha$  and CTGF from HL-1 cells exposed for 8h to 100 $\mu$ M CoCl<sub>2</sub> or hypoxia (2% O<sub>2</sub>) (C), in combination with 10nM E2, 1 $\mu$ M 25HC and 10 $\mu$ M PD or 10 $\mu$ M SB, as indicated.  $\beta$ -tubulin serves as loading control. Data (mean  $\pm$  SD) are representative of three independent experiments. Side panels show densitometric analysis of the blots, normalized to  $\beta$ -tubulin. (\*), (°) indicate  $p < 0.05$  for cells receiving vehicle (-) versus treatments or for cells cultured under normoxia versus cells exposed to hypoxia. doi:10.1371/journal.pone.0016631.g008

zyme A (HMG CoA) reductase activity or by increasing cholesterol esterification, thereby leading to a decreased synthesis and/or augmented storage of cholesterol [50]. In the cell, 25HC is synthesized from cholesterol by auto-oxidation or enzymatically by a non-heme, iron-containing protein [25,51]. Significant levels of 25HC are produced in different cell contexts [25,52–53] and even in a selective manner with respect to other cholesterol derivatives, as occurs in astrocytes [54]. Several studies in animals and humans have shown that oxysterols, including 25HC, are absorbed in the gut, transported into the circulation within chylomicrons and then are taken up into tissues depending on diet and metabolism [55].

Moreover, previous investigations reported different 25HC plasma levels, ranging from ng/ml [56] to  $\mu$ g/ml [57]. In addition, 25HC has been demonstrated to promote the differentiation of Leydig cells [58], hepatocytes and keratinocytes [59–60] and to induce fatty acid synthase (FAS) expression [61], as we confirmed to occur also in a cell context lacking ERs like SkBr3 breast cancer cells (Fig. S5). Likewise, 25HC stimulated interleukin-8 secretion

in monocytic THP-1 cells activating the ERK/c-fos/AP-1 transduction pathway in a calcium-dependent manner [62] and exerted dose-dependent effects on cell proliferation [54,63–64].

In this study, we have demonstrated that 25HC is able 1) to activate ER $\alpha$ , possibly by binding directly as an agonistic ligand, 2) to up-regulate diverse estrogen target genes, 3) to modulate ER $\alpha$  and Cyclin D1 protein levels and 4) to stimulate growth effects in breast and ovarian cancer cells. In addition, we have shown that 25HC in cardiomyocytes elicits an ER-mediated prevention of hypoxia-dependent apoptosis and inhibition of the up-regulation of hypoxia-induced expression of HIF-1 $\alpha$  and CTGF. Noteworthy, 25HC mimicked the action of E2 to prevent hypoxia-induced HIF-1 $\alpha$  and CTGF expression in isolated and perfused rat heart preparations.

Recently, it has been reported that the 27HC derivative can interact with and regulate the activity of both ER isoforms, triggering diverse biological actions either in vitro or in vivo [65]. In particular, 27HC acted as a selective estrogen receptor

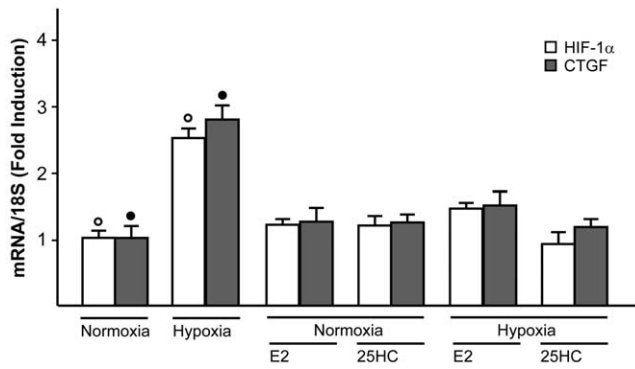

**Figure 9. Evaluation of HIF-1 $\alpha$  and CTGF mRNA expression in hypoxic rat heart preparations.** HIF-1 $\alpha$  and CTGF mRNA expression was evaluated by real time PCR after 1h exposure to low pO<sub>2</sub> levels (40%) and in presence of 1nM E2 or 100nM 25HC treatment, as indicated. mRNA values obtained from control and hypoxic rat hearts were normalized for 18S expression and shown as fold change in triplicate experiments. (°), (•) indicate  $p < 0.05$  for control versus hypoxic rat hearts.

doi:10.1371/journal.pone.0016631.g009

modulator (SERM) on the basis of its agonist/antagonist activities elicited in a cell- and promoter-dependent manner [66–67]. In breast cancer cells 27HC stimulated both gene transcription and growth effects, suggesting its potential role in the progression of breast tumor in obese/hypercholesterolemic women [66]. Interestingly, 27HC inhibited the transcription-dependent and even transcription-independent estrogen-mediated production of nitric oxide by vascular cells leading to a decreased vasorelaxation of rat aorta upon estrogen exposure [67]. Consequently, 27HC was indicated as a contributing factor to the loss of estrogen protection in vascular disease. Collectively, in estrogen-dependent tumor cells 27HC and 25HC exhibited similar stimulatory action, however they displayed distinct ER-mediated functions according to the cardiovascular model system used.

In breast and ovarian cancer, E2 stimulates proliferative effects through ER $\alpha$  [68–70]. On the basis of our results, it could be possible to suppose that 25HC might be involved in the progression of breast and ovarian tumors. In this regard, it should be taken into account that 25HC plasma levels increase after ingestion of a meal rich in oxysterols, as also detected after a dietary cholesterol challenge [25]. Indeed, increased cholesterol levels, which are often associated with obesity [71], are also detected in women with high risk of breast and ovarian cancer [72–74].

As it concerns the role of HIF-1 $\alpha$  in apoptosis, its function remains somewhat controversial and appears to be cell type and context specific [75–78], a number of reports have demonstrated its contribution to programmed cell death during hypoxia [79–80]. Interestingly, it has been shown that hypoxia-induced HIF-1 $\alpha$  activates ER $\alpha$  [81–82], further associating these transduction pathways to the intricate balance between factors that induce or counteract apoptosis in hypoxic conditions. To date, a large body of evidence has suggested that estrogen-activated ER $\alpha$  favorably influences cardiomyocyte survival both in vivo and in vitro model systems [8,40,83–85], explaining the gender-dependent protection against atherosclerosis and cardiovascular disease [86]. Our findings confirmed that E2 is able to prevent the hypoxia-induced apoptosis in cardiomyocytes and this ability was also exhibited by 25HC, which mimicked the potential of estrogen to regulate HIF-1 $\alpha$  expression through ER $\alpha$  along with the rapid intracellular signaling such as ERK and p38 kinases.

Previous studies have demonstrated that HIF-1 $\alpha$  is required for hypoxic induction of CTGF [47], which is involved in fibrotic processes in several tissues including the heart [21]. CTGF expression was found strongly up-regulated in atherosclerotic plaques [87]. Likewise, in vascular smooth muscle cells (VSMCs) CTGF overexpression induced apoptosis [88] and led to MMP2 activity [89] which would result in plaque destabilization. Accordingly, CTGF was mainly detected in complicated plaques where it stimulated mononuclear cell chemotaxis, acting as a pro-atherogenic factor [90]. An increased expression of CTGF was reported in infarcted and non-infarcted cardiac tissues [91–92], indicating CTGF as an attractive therapeutic target to treat fibrotic diseases and suggesting the use of its plasma levels as a biomarker for heart failure [21]. Indeed, our data have provided novel insight regarding the ER $\alpha$ -mediated ability of both E2 and 25HC to abolish the HIF-1 $\alpha$  dependent up-regulation of CTGF in cardiomyocytes. Most importantly, 25HC displayed similar activity to E2 in preventing the hypoxia-induced expression of HIF-1 $\alpha$  and CTGF in rat heart preparations, further extending to an in vivo model system its potential effects against hypoxic environments.

Here, we have demonstrated that 25HC activates the ER-mediated signaling in estrogen sensitive breast and ovarian cancer cells as well as in vascular model systems, hence mimicking the multifaceted estrogen action.

## Supporting Information

**Figure S1 mRNA expression of ER $\beta$  target genes.** (A) evaluation of SERPINF1, HSPA1L and SELENBP1 expression by real-time PCR in Hek293 cells transfected for 24 h with a vector or an ER $\beta$  expression plasmid. Data (mean  $\pm$  SD) obtained from three independent experiments were normalized for 18S expression and shown as fold change of RNA expression upon treatment respect to cells treated with vehicle. (B) ER $\beta$  protein expression in Hek293 cells transfected with a vector or ER $\beta$  expression plasmid.  $\beta$ -actin serves as loading control.

(TIF)

**Figure S2 E2 and 25HC prevent CoCl<sub>2</sub>-induced apoptosis in HL-1 cells, as assessed by TUNEL staining.**

Quantitative representation of data (mean  $\pm$  SD) of three independent experiments. (°) indicates  $p < 0.05$  for HL-1 cells receiving vehicle (–) versus treatments, as indicated.

(TIF)

**Figure S3 Evaluation of HIF-1 $\alpha$  and CTGF expression at both mRNA (A) and protein levels (B).**

HL-1 cells were treated with 100nM actinomycin D (Act D) and exposed to hypoxia (2% O<sub>2</sub>) for 4h. (A) results obtained from experiments performed in triplicate were normalized for 18S expression and shown as fold change of RNA expression of cells exposed to hypoxia compared to cells cultured under normoxia. (B) immunoblots of HIF-1 $\alpha$  and CTGF from HL-1 cells cultured under normoxia or hypoxia (2% O<sub>2</sub>), as indicated.  $\beta$ -tubulin serves as a loading control. (•), (°) indicate  $p < 0.05$  for cells cultured under normoxia versus cells exposed to hypoxia.

(TIF)

**Figure S4 25HC prevents the hypoxia-induced mRNA expression of HIF-1 $\alpha$  and CTGF through ER and kinase-mediated signalling.** HIF-1 $\alpha$  and CTGF mRNA expression evaluated by real-time PCR in HL-1 cells cultured under

normoxia or hypoxia (2% O<sub>2</sub>) and treated with 10nM E2 and 1 $\mu$ M 25HC in combination with 10 $\mu$ M ICI, 10 $\mu$ M PD or 10 $\mu$ M SB, as indicated. Results obtained from experiments performed in triplicate were normalized for 18S expression and shown as fold change of RNA expression of cells exposed to hypoxia compared to cells cultured under normoxia. (\*), (°) indicate  $p < 0.05$  for cells cultured under normoxia versus cells exposed to hypoxia. (TIF)

**Figure S5 25HC (1 $\mu$ M) induces FAS mRNA expression in SkBr3 cells, as evaluated by real time PCR. Data (mean  $\pm$  SD) obtained from three independent experiments**

## References

- Kuiper GG, Enmark E, Peltö-Huikko M, Nilsson S, Gustafsson JA (1996) Cloning of a novel receptor expressed in rat prostate and ovary. *Proc Natl Acad Sci USA* 93: 5925–5930.
- Osborne CK, Schiff R (2005) Estrogen-receptor biology: continuing progress and therapeutic implications. *J Clin Oncol* 23: 1616–1622.
- Tora L, White J, Brou C, Tasset D, Webster N, et al. (1989) The human estrogen receptor has two independent nonacidic transcriptional activation functions. *Cell* 59: 477–487.
- Brzozowski AM, Pike AC, Dauter Z, Hubbard RE, Bonn T, et al. (1997) Molecular basis of agonism and antagonism in the oestrogen receptor. *Nature* 389: 753–758.
- Paige LA, Christensen DJ, Gron H, Norris JD, Gottlin EB, et al. (1999) Estrogen receptor (ER) modulators each induce distinct conformational changes in ER $\alpha$  and ER $\beta$ . *Proc Natl Acad Sci USA* 96: 3999–4004.
- Deroo BJ, Korach KS (2006) Estrogen receptors and human disease. *J Clin Invest* 116: 561–70.
- Fabian CJ, Kimler BF (2005) Selective estrogen-receptor modulators for primary prevention of breast cancer. *J Clin Oncol* 23: 1644–1655.
- Kim JK, Levin ER (2006) Estrogen signaling in the cardiovascular system. *Nucl Recept Signal* 4: e013.
- Karas RH, Schulten H, Pare G, Aronovitz MJ, Ohlsson C, et al. (2001) Effects of estrogen on the vascular injury response in estrogen receptor  $\alpha$ ,  $\beta$  (double) knockout mice. *Circ Res* 89: 534–9.
- Guo X, Razandi M, Pedram A, Kassab G, Levin ER (2005) Estrogen induces vascular wall dilation: mediation through kinase signaling to nitric oxide and estrogen receptors  $\alpha$  and  $\beta$ . *J Biol Chem* 280: 19704–10.
- Pedram A, Razandi M, Aitkenhead M, Levin ER (2005) Estrogen inhibits cardiomyocyte hypertrophy in vitro. Antagonism of calcineurin-related hypertrophy through induction of MCP1. *J Biol Chem* 280: 26339–48.
- Patten RD, Pourati I, Aronovitz MJ, Baur J, Celestin F, et al. (2004) 17 $\beta$ -estradiol reduces cardiomyocyte apoptosis in vivo and in vitro via activation of phospho-inositide-3 kinase/Akt signaling. *Circ Res* 95: 692–9.
- Zhao ZQ (2004) Oxidative stress-elicited myocardial apoptosis during reperfusion. *Curr Opin Pharmacol* 4: 159–65.
- Higgins DF, Lappin DW, Kieran NE, Anders HJ, Watson RW, et al. (2003) DNA oligonucleotide microarray technology identifies fisp-12 among other potential fibrogenic genes following murine unilateral ureteral obstruction (UUO): modulation during epithelial-mesenchymal transition. *Kidney Int* 64: 2079–2091.
- Igarashi A, Okochi H, Bradham DM, Grotendorst GR (1993) Regulation of connective tissue growth factor gene expression in human skin fibroblasts and during wound repair. *Mol Biol Cell* 4: 637–645.
- Dammeier J, Brauchle M, Falk W, Grotendorst GR, Werner S (1998) Connective tissue growth factor: a novel regulator of mucosal repair and fibrosis in inflammatory bowel disease? *Int J Biochem Cell Biol* 30: 909–922.
- Leask A, Holmes A, Abraham DJ (2002) Connective tissue growth factor: a new and important player in the pathogenesis of fibrosis. *Curr Rheumatol Rep* 4: 136–142.
- Shimo T, Nakanishi T, Nishida T, Asano M, Sasaki A, et al. (2001) Involvement of CTGF, a hypertrophic chondrocyte-specific gene product, in tumor angiogenesis. *Oncology* 61: 315–322.
- Xie D, Nakachi K, Wang H, Elashoff R, Koefler HP (2001) Elevated levels of connective tissue growth factor, WISP-1, and CYR61 in primary breast cancers associated with more advanced features. *Cancer Res* 61: 8917–8923.
- Kondo S, Kubota S, Shimo T, Nishida T, Yoshimichi G, et al. (2002) Connective tissue growth factor increased by hypoxia may initiate angiogenesis in collaboration with matrix metalloproteinases. *Carcinogenesis* 23: 769–776.
- Daniels A, van Bilsen M, Goldschmeding R, van der Vusse GJ, van Nieuwenhoven FA (2009) Connective tissue growth factor and cardiac fibrosis. *Acta Physiol (Oxf)* 195: 321–38.
- Björkhem I, Diczfalussy U (2002) Oxysterols: friends, foes, or just fellow passengers? *Arterioscler Thromb Vasc Biol* 22: 734–42.
- Russell DW (2003) The enzymes, regulation, and genetics of bile acid synthesis. *Annual Reviews of Biochemistry* 72: 137–174.
- Schroepfer GJ, Jr. (2000) Oxysterols, Modulators of cholesterol metabolism and other processes. *Physiol Rev* 80: 361–554.
- Johnson KA, Morrow CJ, Knight GD, Scallen TJ (1994) In vivo formation of 25-hydroxycholesterol from endogenous cholesterol after a single meal, dietary cholesterol challenge. *J Lipid Res* 35: 2241–2253.
- Hodis HN, Chauban A, Hashimoto S, Crawford DW, Sevanian A (1992) Probucol reduces plasma and aortic wall oxysterol levels in cholesterol-fed rabbits independently of its plasma cholesterol lowering effect. *Atherosclerosis* 96: 125–134.
- Li-Hawkins J, Lund EG, Turley SD, Russell DW (2000) Disruption of the oxysterol 7 $\alpha$ -hydroxylase gene in mice. *J Biol Chem* 275: 16536–16542.
- Claycomb WC, Lanson NA, Jr., Stallworth BS, Egeland DB, Delcarpio JB, et al. (1998) HL-1 cells: a cardiac muscle cell line that contracts and retains phenotypic characteristics of the adult cardiomyocyte. *Proc Natl Acad Sci USA* 95: 2979–84.
- Bunone G, Briand PA, Miksicki RJ, Picard D (1996) Activation of the unliganded estrogen receptor by EGF involves the MAP kinase pathway and direct phosphorylation. *EMBO J* 15: 2174–2183.
- Webb P, Nguyen P, Shinsako J, Anderson C, Feng W, et al. (1998) Estrogen receptor activation function 1 works by binding p160 coactivator proteins. *Mol Endocrinol* 12: 1605–1618.
- Maggiolini M, Bonfiglio D, Marsico S, Panno ML, Cenni B, et al. (2001) Estrogen receptors  $\alpha$  mediates the proliferative but not the cytotoxic dose-dependent effects of two major phytoestrogens on human breast cancer cells. *Mol Pharmacology* 60: 595–602.
- Lappano R, Rosano C, Madeo A, Albanito L, Plastina P, et al. (2009) Structure-activity relationships of resveratrol and derivatives in breast cancer cells. *Molecular Nutrition and Food Research* 53: 845–858.
- Lee YJ, Gorski J (1996) Estrogen-induced transcription of the progesterone receptor gene does not parallel estrogen receptor occupancy. *Proc Natl Acad Sci USA* 93: 15180–15184.
- Gavrieli Y, Sherman Y, Ben-Sasson SA (1992) Identification of programmed cell death in situ via specific labelling of nuclear DNA fragmentation. *J Cell Biol* 119: 493–501.
- Cerra MC, De Iuri L, Angelone T, Corti A, Tota B (2006) Recombinant N-terminal fragments of chromogranin-A modulate cardiac function of the Langendorff-perfused rat heart. *Basic Res Cardiol* 101: 43–52.
- Zhao C, Putnik M, Gustafsson JA, Dahlman-Wright K (2009) Microarray analysis of altered gene expression in ER $\beta$ -overexpressing HEK293 cells. *Endocrine* 36: 224–32.
- McKenna NJ, Lanz RB, O'Malley BW (1999) Nuclear receptor coregulators: cellular and molecular biology. *Endocr Rev* 20: 321–44.
- Santagati S, Gianazza E, Agrati P, Vegeto E, Patrone C, et al. (1997) Oligonucleotide squelching reveals the mechanism of estrogen receptor autologous down-regulation. *Mol Endocrinol* 11: 938–949.
- Foster JS, Wimalasena J (1996) Estrogen regulates activity of cyclin-dependent kinases and retinoblastoma protein phosphorylation in breast cancer cells. *Mol Endocrinol* 10: 488–498.
- Patten RD, Karas RH (2006) Estrogen replacement and cardiomyocyte protection. *Trends Cardiovasc Med* 16: 69–75.
- Zhao L, Brinton RD (2006) Select estrogens within the complex formulation of conjugated equine estrogens (Premarin) are protective against neurodegenerative insults: implications for a composition of estrogen therapy to promote neuronal function and prevent Alzheimer's disease. *BMC Neurosci* 7: 24.
- Gerstner B, Lee J, DeSilva TM, Jensen FE, Volpe JJ, et al. (2009) 17 $\beta$ -estradiol protects against hypoxic/ischemic white matter damage in the neonatal rat brain. *J Neurosci Res* 87: 2078–86.
- Chen JX, Zhao T, Huang DX (2009) Protective effects of edaravone against cobalt chloride-induced apoptosis in PC12 cells. *Neurosci Bull* 25: 67–74.
- Peters K, Unger RE, Barth S, Gerdes T, Kirkpatrick CJ (2001) Induction of apoptosis in human microvascular endothelial cells by divalent cobalt ions. Evidence for integrin-mediated signaling via the cytoskeleton. *Mater Sci Mater Med* 12: 955–8.

45. Leask A, Parapuram SK, Shi-Wen X, Abraham DJ (2009) Connective tissue growth factor (CTGF, CCN2) gene regulation: a potent clinical/bio-marker of fibroproliferative disease? *J Cell Commun Signal* 3: 89–94.
46. Rimón E, Chen B, Shanks AL, Nelson DM, Sadovsky Y (2008) Hypoxia in human trophoblasts stimulates the expression and secretion of connective tissue growth factor. *Endocrinology* 149: 2952–8.
47. Hong KH, Yoo SA, Kang SS, Choi JJ, Kim WU, et al. (2006) Hypoxia induces expression of connective tissue growth factor in scleroderma skin fibroblasts. *Clin Exp Immunol* 146: 362–70.
48. Hua K, Din J, Cao Q, Feng W, Zhang Y, et al. (2009) Estrogen and progesterone regulate HIF-1 $\alpha$  expression in ovarian cancer cell lines via the activation of Akt signaling transduction pathway. *Oncol Rep* 21: 893–8.
49. Kazi AA, Koos RD (2007) Estrogen-induced activation of hypoxia-inducible factor-1 $\alpha$ , vascular endothelial growth factor expression, and edema in the uterus are mediated by the phosphatidylinositol 3-kinase/Akt pathway. *Endocrinology* 148: 2363–74.
50. Kandutsch AA, Chen HW (1974) Inhibition of cell growth by oxygenated derivatives of cholesterol. *J Biol Chem* 249: 6057–6061.
51. Lund EG, Kerr TA, Sakai J, Li WP, Russell DW (1998) cDNA cloning of mouse and human cholesterol 25-hydroxylases, polytopic membrane proteins that synthesize a potent oxysterol regulator of lipid metabolism. *J Biol Chem* 273: 34316–34327.
52. Lukyanenko YO, Chen JJ, Hutson JC (2001) Production of 25-hydroxycholesterol by testicular macrophages, and its effects on Leydig cells. *Biol Reprod* 64: 790–796.
53. Nguyen VP, Chen SH, Pizzuto K, Cantarutti A, Termini A, et al. (2010) 25-Hydroxycholesterol exerts both a cox-2-dependent transient proliferative effect and cox-2-independent cytotoxic effect on bovine endothelial cells in a time- and cell-type-dependent manner. *J Angiogenesis Res* 11: 2–24.
54. Velázquez E, Santos A, Montes A, Blázquez E, Ruiz-Albusac JM (2006) 25-Hydroxycholesterol has a dual effect on the proliferation of cultured rat astrocytes. *Neuropharmacology* 51: 229–37.
55. Brown AJ, Jessup W (2009) Oxysterols: Sources, cellular storage and metabolism, and new insights into their roles in cholesterol homeostasis. *Mol Aspects Med* 30: 111–22.
56. Dzeletovic S, Breuer O, Lund E, Diczfalusy U (1995) Determination of cholesterol oxidation products in human plasma by isotope dilution-mass spectrometry. *Anal Biochem* 225: 73–80.
57. Sharma I, Dhaliwal LK, Saha SC, Sangwan S, Dhawan V (2010) Role of 8-iso-prostaglandin F $_{2\alpha}$  and 25-hydroxycholesterol in the pathophysiology of endometriosis. *Fertil Steril* 94: 63–70.
58. Chen JJ, Lukyanenko Y, Hutson JC (2002) 25-hydroxycholesterol is produced by testicular macrophages during the early postnatal period and influences differentiation of Leydig cells in vitro. *Biol Reprod* 66: 1336–41.
59. Hanley K, Ng DC, He SS, Lau P, Min K, et al. (2000) Oxysterols induce differentiation in human keratinocytes and increase AP-1-dependent involucrin transcription. *J Invest Dermatol* 114: 545–553.
60. Yokoyama S, Nozawa F, Mugita N, Ogawa M (1999) Suppression of rat liver tumorigenesis by 25-hydroxycholesterol and all-trans retinoic acid: differentiation therapy for hepatocellular carcinoma. *Int J Oncol* 15: 565–569.
61. Ma Y, Xu L, Rodriguez-Agudo D, Li X, Heuman DM, et al. (2008) 25-Hydroxycholesterol-3-sulfate regulates macrophage lipid metabolism via the LXR/SREBP-1 signaling pathway. *Am J Physiol Endocrinol Metab* 295: E1369–79.
62. Lemaire-Ewing S, Berthier A, Royer MC, Logette E, Corcos L, et al. (2009) 7 $\beta$ -Hydroxycholesterol and 25-hydroxycholesterol-induced interleukin-8 secretion involves a calcium-dependent activation of c-fos via the ERK1/2 signaling pathway in THP-1 cells: oxysterols-induced IL-8 secretion is calcium-dependent. *Cell Biol Toxicol* 25: 127–39.
63. Travert C, Carreau S, Le Goff D (2006) Induction of apoptosis by 25-hydroxycholesterol in adult rat Leydig cells: protective effect of 17 $\beta$ -estradiol. *Reprod Toxicol* 22: 564–70.
64. Choi YK, Kim YS, Choi IY, Kim SW, Kim WK (2008) 25-hydroxycholesterol induces mitochondria-dependent apoptosis via activation of glycogen synthase kinase-3 $\beta$  in PC12 cells. *Free Radic Res* 42: 544–53.
65. DuSell CD, McDonnell DP (2008) 27-Hydroxycholesterol: a potential endogenous regulator of estrogen receptor signaling. *Trends Pharmacol Sci* 29: 510–4.
66. DuSell CD, Umetani M, Shaul PW, Mangelsdorf DJ, McDonnell DP (2008) 27-hydroxycholesterol is an endogenous selective estrogen receptor modulator. *Mol Endocrinol* 22: 65–77.
67. Umetani M, Domoto H, Gormley AK, Yuhanna IS, Cummins CL, et al. (2007) 27-Hydroxycholesterol is an endogenous SERM that inhibits the cardiovascular effects of estrogen. *Nat Med* 13: 1185–92.
68. Flototto T, Djahansouzi S, Glaser M, Hanstein B, Niederacher D, et al. (2001) Hormones and hormone antagonists: mechanisms of action in carcinogenesis of endometrial and breast cancer. *Horm Metab Res* 33: 451–457.
69. Hewitt SC, Korach KS (2003) Oestrogen receptor knockout mice: roles for oestrogen receptors  $\alpha$  and  $\beta$  in reproductive tissues. *Reproduction* 125: 143–149.
70. O'Donnell AJM, Macleod KG, Burns DJ, Smyth JF, Langdon SP (2005) Estrogen receptor  $\alpha$  mediates gene expression changes and growth response in ovarian cancer cells exposed to estrogen. *Endocr Relat Cancer* 12: 851–66.
71. Burkard I, von Eckardstein A, Waeber G, Vollenweider P, Rentsch KM (2007) Lipoprotein distribution and biological variation of 24S- and 27-hydroxycholesterol in healthy volunteers. *Atherosclerosis* 194: 71–78.
72. Furberg AS, Veierod MB, Wilsgaard T, Bernstein L, Thune I (2004) Serum high-density lipoprotein cholesterol, metabolic profile, and breast cancer risk. *J Natl Cancer Inst* 96: 1152–1160.
73. Stoll BA (2002) Upper abdominal obesity, insulin resistance and breast cancer risk. *Int J Obes Relat Metab Disord* 26: 747–753.
74. Salehi F, Dunfield L, Phillips KP, Krewski D, Vanderhyden BC (2008) Risk factors for ovarian cancer: an overview with emphasis on hormonal factors. *J Toxicol Environ Health B Crit Rev* 11: 301–21.
75. Malhotra R, Tyson DW, Rosevear HM, Brosius 3rd FC (2008) Hypoxia-inducible factor-1 $\alpha$  is a critical mediator of hypoxia induced apoptosis in cardiac H9c2 and kidney epithelial HK-2 cells. *BMC Cardiovasc Disord* 8: 9.
76. Chen J, Zhao S, Nakada K, Kuge Y, Tamaki N, et al. (2003) Dominant-negative hypoxia-inducible factor-1  $\alpha$  reduces tumorigenicity of pancreatic cancer cells through the suppression of glucose metabolism. *Am J Pathol* 162: 1283–91.
77. Piret JP, Mottet D, Raes M, Michiels C (2002) Is HIF-1 $\alpha$  a pro- or an anti-apoptotic protein? *Biochem Pharmacol* 64: 889–92.
78. Dai S, Huang ML, Hsu CYY, Clifford Chao KS (2003) Inhibition of hypoxia inducible factor 1  $\alpha$  causes oxygen-independent cytotoxicity and induces p53 independent apoptosis in glioblastoma cells. *Int J Radiat Oncol Biol Phys* 55: 1027–1036.
79. Krick S, Eul BG, Hanzel J, Savai R, Grimminger F, et al. (2005) Role of hypoxia-inducible factor-1 $\alpha$  in hypoxia-induced apoptosis of primary alveolar epithelial type II cells. *Am J Respir Cell Mol Biol* 32: 395–403.
80. Greijer AE, van der Wall E (2004) The role of hypoxia inducible factor 1 (HIF-1) in hypoxia induced apoptosis. *J Clin Pathol* 57: 1009–14.
81. Cho J, Bahn JJ, Park M, Ahn W, Lee YJ (2006) Hypoxic activation of unoccupied estrogen-receptor- $\alpha$  is mediated by hypoxia-inducible factor-1  $\alpha$ . *J Steroid Biochem Mol Biol* 100: 18–23.
82. Yi JM, Kwon HY, Cho JY, Lee YJ (2009) Estrogen and hypoxia regulate estrogen receptor  $\alpha$  in a synergistic manner. *Biochem Biophys Res Commun* 378: 842–6.
83. Sovershaev MA, Egorina EM, Andreassen TV, Jonassen AK, Ytrehus K (2006) Preconditioning by 17 $\beta$ -estradiol in isolated rat heart depends on PI3-K/PKB pathway, PKC, and ROS. *Am J Physiol Heart Circ Physiol* 291: H1554–62.
84. Jeanes HL, Tabor C, Black D, Ederveen A, Gray GA (2008) Oestrogen-mediated cardioprotection following ischaemia and reperfusion is mimicked by an oestrogen receptor (ER) $\alpha$  agonist and unaffected by an ER  $\beta$  antagonist. *J Endocrinol* 197: 493–501.
85. Kim JK, Pedram A, Razandi M, Levin ER (2006) Estrogen prevents cardiomyocyte apoptosis through inhibition of reactive oxygen species and differential regulation of p38 kinase isoforms. *J Biol Chem* 281: 6760–7.
86. Ling S, Komesaroff P, Sudhir K (2006) Cellular mechanisms underlying the cardiovascular actions of oestrogens. *Clin Sci (Lond)* 111: 107–18.
87. Oemar BS, Werner A, Garnier JM, Do DD, Godoy N, et al. (1997) Human connective tissue growth factor is expressed in advanced atherosclerotic lesions. *Circulation* 95: 831–839.
88. Hishikawa K, Oemar BS, Tanner FC, Nakaki T, Fujii T, et al. (1999) Overexpression of connective tissue growth factor gene induces apoptosis in human aortic smooth muscle cells. *Circulation* 100: 2108–2112.
89. Fan WH, Karnovsky MJ (2002) Increased MMP-2 expression in connective tissue growth factor over-expression vascular smooth muscle cells. *J Biol Chem* 277: 9800–9805.
90. Cicha I, Yilmaz A, Suzuki Y, Maeda N, Daniel WG, et al. (2006) Connective tissue growth factor is released from platelets under high shear stress and is differentially expressed in endothelium along atherosclerotic plaques. *Clin Hemorheol Microcirc* 35: 203–206.
91. Ahmed MS, Oic E, Vinge LE, Yndestad A, Oystein Andersen G, et al. (2004) Connective tissue growth factor – a novel mediator of angiotensin II-stimulated cardiac fibroblast activation in heart failure in rats. *J Mol Cell Cardiol* 36: 393–404.
92. Chen MM, Lam A, Abraham JA, Schreiner GF, Joly AH (2000) CTGF expression is induced by TGF- $\beta$  in cardiac fibroblasts and cardiac myocytes: a potential role in heart fibrosis. *J Mol Cell Cardiol* 32: 1805–1819.
